# Supplementary material for: Magnetic-based silver composite microspheres with nanosheet-assembled shell for effective SERS substrate
Source: Royal Society of Chemistry journal article supplement (doi:10.1039/c3tc30106k), 2013-01-01
Supplement: c3tc30106k.pdf [file c3tc30106k.pdf]

Supporting Information Available

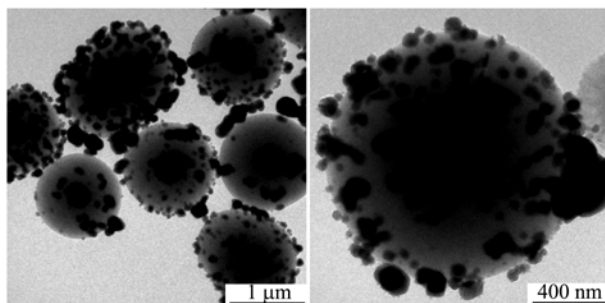

**Fig. S1** TEM images of the product synthesized without seeding modification.

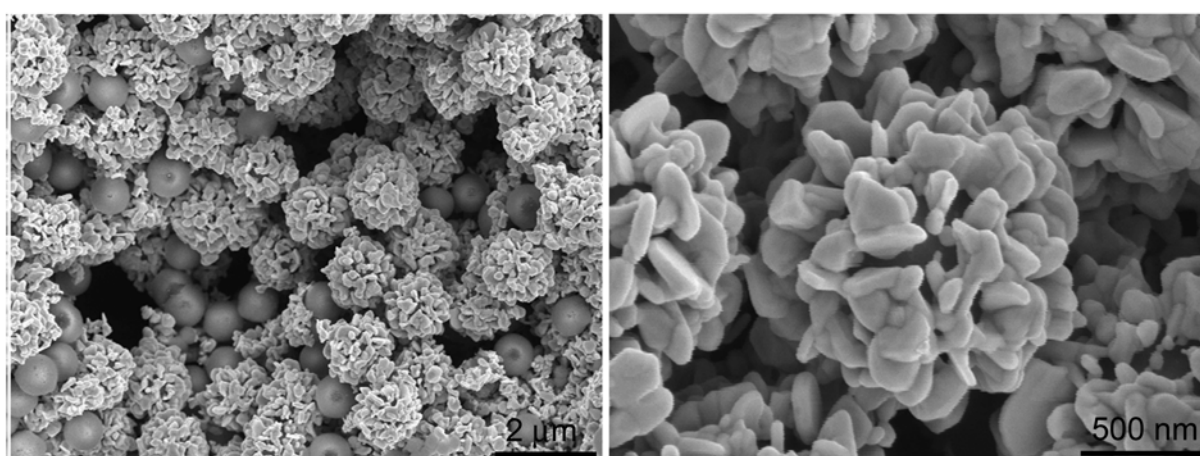

**Fig. S2.** SEM images of product synthesized by adding all AA in 1 minute.

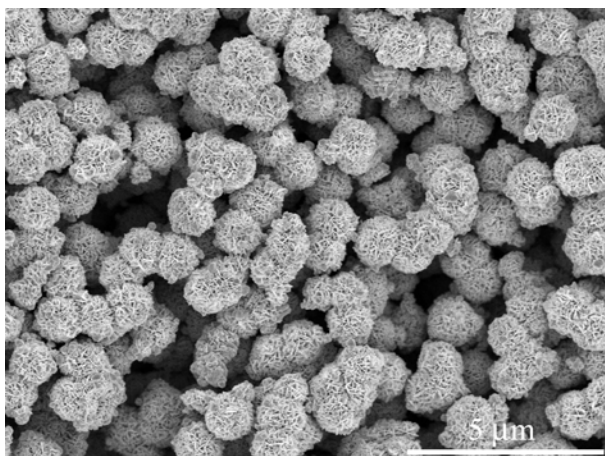

**Fig. S3** SEM image of the product synthesized without sonicating technique.

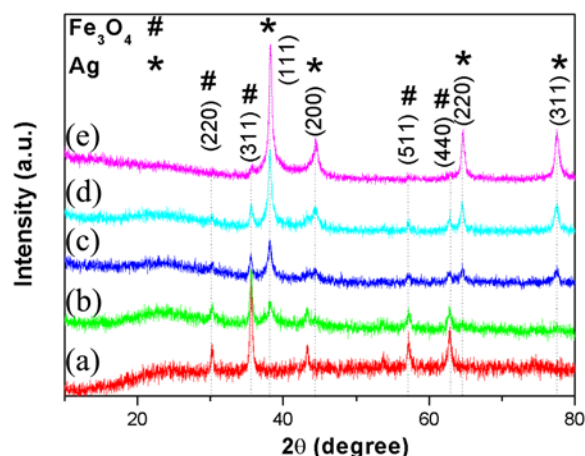

**Fig. S4** XRD patterns of (a)  $\text{Fe}_3\text{O}_4@/\text{SiO}_2$  microspheres, (b)  $\text{Fe}_3\text{O}_4@/\text{SiO}_2$  microspheres with Ag seeds and the products obtained at different reaction intervals: (c) 2 min, (d) 4 min and (e) 15 min.

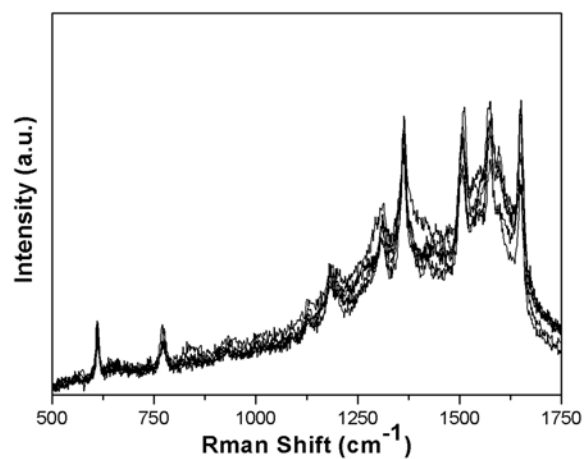

**Fig. S5** SERS spectra of R6G from six different spots on the film assembled by  $\text{Fe}_3\text{O}_4@/\text{SiO}_2@/\text{Ag}$  microspheres shown in Fig. 1g ( $10^{-12}$  M).

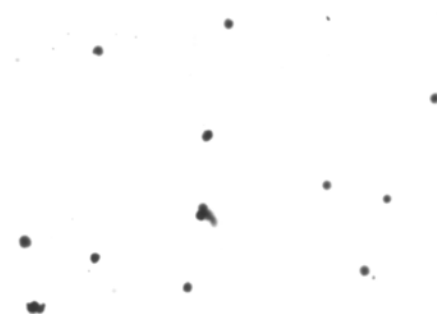

**Fig. S6** An optical image of the  $\text{Fe}_3\text{O}_4@/\text{SiO}_2@/\text{Ag}$  microspheres

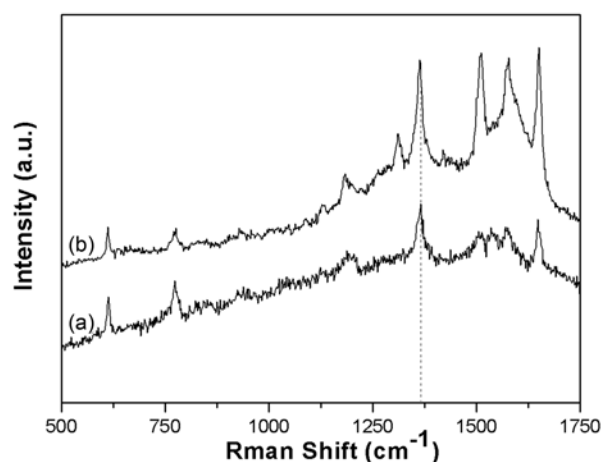

**Fig. S7** Raman spectra of R6G. (a) Normal Raman spectrum of pure R6G, and (b) SERS spectrum of R6G at the concentration of 10<sup>-12</sup> M.
